# Supplementary material
Source: HighWire-hosted journal article supplement (https://www.annfammed.org/highwire/filestream/8157/field_highwire_adjunct_files/0/GoodyearSmith-Supp_App.pdf)
Supplement: GoodyearSmith-Supp_App.pdf [file GoodyearSmith-Supp_App.pdf]

Online Supplementary Material

Goodyear-Smith F, Kenealy T, Wells S, Arroll B, Horsburgh M. Patients' preferences for ways to communicate benefits of cardiovascular medication. *Ann Fam Med*. 2011;9(2):121-127.

<http://www.annfammed.org/cgi/content/full/9/2/121/DC1>

**Supplemental Appendix. The Questionnaire, Using the Example Given to Patients at Approximately 15% 5-year Risk of a Cardiovascular Event**

ID number \_\_\_\_\_

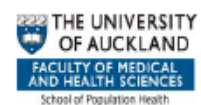

This questionnaire is about explaining risks.

Imagine if a person like you was told that they have a 15% risk of having a heart attack over the next 5 years.

Below are different ways of expressing risk of having a heart attack with and without a new medication. We would like to know the best way to explain the benefit of a new medication that has few side-effects and is to be taken daily to reduce your chance of having a heart attack. Please answer as if you were a person like you who has a 15% risk of a heart attack in the next 5 years.

Please look at the five statements below and number them in order from which is most likely through to which is least likely to encourage you to take a medication every day. Most likely = 1 Next most likely = 2 etc to Least likely = 5

| All these questions apply to a fully funded new medication |                                                                                                                                                                                                                                                                      | This would encourage you to take this medication every day<br>Most (1) to Least (5) |
|------------------------------------------------------------|----------------------------------------------------------------------------------------------------------------------------------------------------------------------------------------------------------------------------------------------------------------------|-------------------------------------------------------------------------------------|
| a                                                          | By taking this new medication for 5 years you will be 33% less likely to have a heart attack                                                                                                                                                                         |                                                                                     |
| b                                                          | Without taking this medication your risk of a heart attack in the next 5 years is 15% and with taking this medication your risk is 10% in the next 5 years                                                                                                           |                                                                                     |
| c                                                          | 20 people will need to take this new medication for 5 years for one person to be prevented from having a heart attack                                                                                                                                                |                                                                                     |
| d                                                          | The odds of you having a heart attack are 6 to 1 without medication and 9 to 1 if you take the medication for 5 years                                                                                                                                                |                                                                                     |
| e                                                          | There are 100 people like you. If they do not take this new medication then 15 will have a heart attack and 85 will not. If they all take this new medication for 5 years then 10 people will have a heart attack and 5 will be prevented from having a heart attack |                                                                                     |

PTO ➔

### Online Supplementary Data

<http://www.annfammed.org/cgi/content/full/9/2/121/DC1>

Please look at the five statements below again.

If you needed to make a decision today about taking a medication every day from now on number the five statements below in order from which one gives you the most helpful information to which one gives you the least helpful information

Most helpful information = 1

Next most helpful = 2

etc to

Least helpful= 5

| All these questions apply to a fully funded new medication |                                                                                                                                                                                                                                                                      | Indicate if statement helps you to make a decision.<br>Most (1) to Least (5) |
|------------------------------------------------------------|----------------------------------------------------------------------------------------------------------------------------------------------------------------------------------------------------------------------------------------------------------------------|------------------------------------------------------------------------------|
| a                                                          | By taking this new medication for 5 years you will be 33% less likely to have a heart attack                                                                                                                                                                         |                                                                              |
| b                                                          | Without taking this medication your risk of a heart attack in the next 5 years is 15% and with taking this medication your risk is 10% in the next 5 years                                                                                                           |                                                                              |
| c                                                          | 20 people will need to take this new medication for 5 years for one person to be prevented from having a heart attack                                                                                                                                                |                                                                              |
| d                                                          | The odds of you having a heart attack are 6 to 1 without medication and 9 to 1 if you take the medication for 5 years                                                                                                                                                |                                                                              |
| e                                                          | There are 100 people like you. If they do not take this new medication then 15 will have a heart attack and 85 will not. If they all take this new medication for 5 years then 10 people will have a heart attack and 5 will be prevented from having a heart attack |                                                                              |

PTO ➡

Some people prefer to have information about the benefits of medications presented visually rather than in words as described above. Below are two different ways to show the benefits of treatment using pictures.

### Picture 1

Here is the risk for 100 people like you having a heart attack in graph form.

The first graph shows the risk over 5 years if the 100 people do not take the new medication.

The second graph shows what will happen if all 100 people take this new medication for 5 years to reduce risk of heart attack.

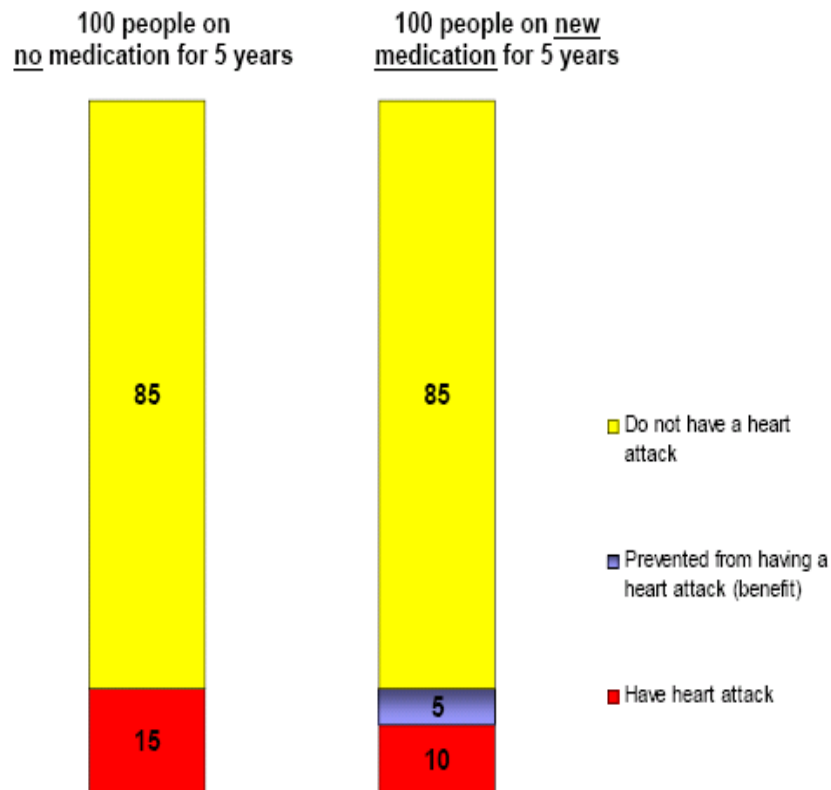

PTO →

**Picture 2.** Here is the risk for 100 people like you having a heart attack in chart form.

The first chart shows the risk over 5 years if the 100 people do not take the new medication.

The second graph shows what will happen if all 100 people take this new medication for 5 years to reduce risk of heart attack.

100 people on no medication for 5 years

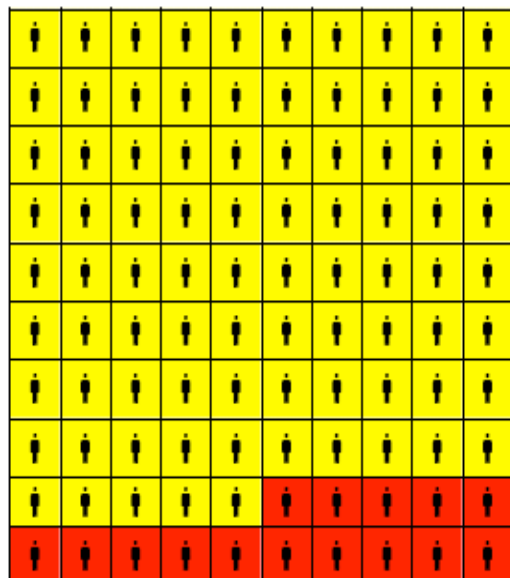

100 people on new medication for 5 years

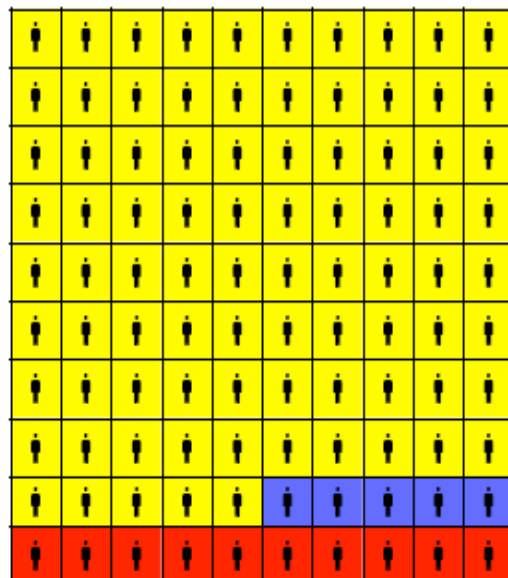

Key:

Do not have heart attack

Prevented from having heart attack

Have heart attack

Which is more likely to encourage you to take a new medication every day:

The graph on the page before? ☐

Or the chart on this page? (tick one) ☐

PTO →

Online Supplementary Data

<http://www.annfammed.org/cgi/content/full/9/2/121/DC1>

Do you prefer having risks explained in numbers (the 5 options you looked at first) or in pictures (the graph or chart)? (tick one)

☐ Numbers

☐ Pictures

Do you prefer doctors to explain risks using numbers and /or pictures or do you prefer them to give their opinion on taking medication?

☐ Numbers &/or pictures

☐ Opinion

Do you follow horse racing?

☐ Yes

☐ No

If an operation had a 99% success rate and a 1% failure rate how would you like it expressed?

☐ 99% successful

☐ 1% failure

☐ Don't mind

Imagine that we toss a coin 1,000 times.

What is your best guess about how many times the coin would come up heads in 1,000 tosses? \_\_\_\_\_ times out of 1,000

In a raffle, the chance of winning a \$10 prize is 1%. What is your best guess about how many people would win a \$10 prize if 1000 people each buy a single ticket in the raffle? \_\_\_\_\_ person(s) out of 1,000

In a sweepstake, the chance of winning a car is 1 in 1,000. What percent of tickets to the sweepstake win a car? \_\_\_\_\_%

How concerned are you about having a heart attack on a scale of 1 to 10 with 1 being not concerned at all and 10 being extremely concerned? (please circle one)

Not concerned at all ← 1.....2.....3.....4.....5.....6.....7.....8.....9.....10 → Extremely concerned

What was your last formal education? ☐ Primary school ☐ High school. If high school at what level did you finish? \_\_\_\_\_

☐ Technical or apprenticeship

☐ University

Gender ☐ M ☐ F

PTO →

Online Supplementary Data

<http://www.annfammed.org/cgi/content/full/9/2/121/DC1>

Age: ☐ <30 ☐ 31-35 ☐ 36-40 ☐ 41-45 ☐ 46-50 ☐ 51-55 ☐ 56-60 ☐ 61-65 ☐ 66-70 ☐ >70

Which ethnic group do you belong to? (Tick the box or boxes which apply to you)

☐ NZ European ☐ Māori ☐ Cook Island Māori ☐ Samoan ☐ Tongan ☐ Niuean ☐ Chinese  
☐ Indian ☐ Other (such as Dutch, Japanese, Tokelauan) Please state \_\_\_\_\_

How do you feel about taking medication daily for the rest of your life to help prevent heart attacks? (please circle one)

Not keen to take medication ← 1.....2.....3.....4.....5.....6.....7.....8.....9.....10 → Keen to take medication

How likely do you think it is that you will have a heart attack in the next 5 years with 1 being not likely to 10 being very likely?

Not likely ← 1.....2.....3.....4.....5.....6.....7.....8.....9.....10 → Very likely

When considering taking medication to reduce the risk of a heart attack please tick the one option that you like the best:

- (a) ☐ The doctor should make the decision  
(b) ☐ The doctor should make the decision, but consider the patient's views  
(c) ☐ The patient and the doctor should make the decision together on an equal basis  
(d) ☐ The patient should make the decision but consider the doctor's opinion  
(e) ☐ The patient should make the decision based on his/her own opinion

Thank you
